# Supplementary material for: Dominant negative ADA2 mutations cause ADA2 deficiency in heterozygous carriers
Source: PubMed Central journal article supplement — medRxiv. 2024 Dec 11:2024.12.09.24317629. Preprint. [Version 1] doi: 10.1101/2024.12.09.24317629 (PMC11661335; doi:10.1101/2024.12.09.24317629), 2024-12-11
Supplement: media-1.pdf [file media-1.pdf]

1 **SUPPLEMENTAL TABLES AND FIGURES**

2 Supplemental Table. 1 Additional SNPs identified in ADA2 via targeted Sanger sequencing. Clinical  
 3 significance were update from gnomAD v4.1.0 (1). MAF, mean allele frequency

| Patient | Variant                | Clinical significance | MAF        |
|---------|------------------------|-----------------------|------------|
| P1      | c.159C>T, p.(Asn53=)   | Benign                | 0.495      |
|         | c.213G>A, p.(Met71Ile) | /                     | 0.00000681 |
|         | c.1359T>C, p.(Tyr453=) | Benign                | 0.307      |
|         | c.1386T>C, p.(Ile462=) | Likely Benign         | 0.000102   |
| P2      | c.159C>T, p.(Asn53=)   | Benign                | 0.495      |
|         | c.213G>A, p.(Met71Ile) | /                     | 0.00000681 |
|         | c.1386T>C, p.(Ile462=) | Likely Benign         | 0.000102   |
| P3      | c.159C>T, p.(Asn53=)   | Benign                | 0.495      |
|         | c.1359T>C, p.(Tyr453=) | Benign                | 0.307      |
| P5      | c.159C>T, p.(Asn53=)   | Benign                | 0.495      |
| P7      | c.159C>T, p.(Asn53=)   | Benign                | 0.495      |
| P8      | c.159C>T, p.(Asn53=)   | Benign                | 0.495      |

4

5 Supplemental Table. 2 Overview of site-directed mutagenesis primers

| Variant      | Forward primer           | Reverse primer                   |
|--------------|--------------------------|----------------------------------|
| <b>G47A</b>  | ATGCGGCTGGCGGGGCGGCTG    | CATCTTTTCTTTCAACAACAGATGCGC      |
| <b>G47R</b>  | GATGCGGCTGAGGGGGCGGCT    | ATCTTTTCTTTCAACAACAGATGCGCCCGTG  |
| <b>G47V</b>  | ATGCGGCTGGTGGGGCGGCTG    | CATCTTTTCTTTCAACAACAGATGCGCCCGTG |
| <b>G47W</b>  | GATGCGGCTGTGGGGCGGCT     | ATCTTTTCTTTCAACAACAGATGCGCCCGTG  |
| <b>R169Q</b> | GAGGATTATCAGAAGCGGGTG    | CAGCAGAATCCACTTGGAAC             |
| <b>E328K</b> | GGTGGGGCATAAGGACACTGG    | AGGTCAAACCCTGCCACC               |
| <b>F355L</b> | CTTACTTCTTACACGCCGAG     | GCAGCTTAACGCCATCCT               |
| <b>T360A</b> | CGCCGAGAAGCAGACTGGCA     | TGGAAGAAGTAAGGCAGCTTAAC          |
| <b>N370K</b> | TAGACAGGAAAATTCTGGATGCTC | TGGAAGTACCCTGCCAGT               |
| <b>H424N</b> | CTTGAGGAACAACCCTTAGC     | TCAGACACCAGTTTCAGC               |
| <b>Y453C</b> | GGCTTGTCTGTGATTTCTATG    | TTTGGCACCAACATAGC                |

6

7

8

9

|               | ICD-10 code | Name                                                             |
|---------------|-------------|------------------------------------------------------------------|
| <b>Liver</b>  | K70.1       | Hepatitis (chronic): alcoholic                                   |
|               | K71.-       | Hepatitis (chronic): drug-induced                                |
|               | K75.3       | Hepatitis (chronic): granulomatous NEC                           |
|               | K75.2       | Hepatitis (chronic): reactive, non-specific                      |
|               | B15 - B19   | Hepatitis (chronic): viral                                       |
|               | K73.0       | Chronic persistent hepatitis, not elsewhere classified           |
|               | K73.1       | Chronic lobular hepatitis, not elsewhere classified              |
|               | K73.2       | Chronic active hepatitis, not elsewhere classified               |
|               | K73.8       | Other chronic hepatitis, not elsewhere classified                |
|               | K73.9       | Chronic hepatitis, unspecified                                   |
|               | K74.6       | Other and unspecified cirrhosis of liver                         |
|               | K76.6       | Portal hypertension                                              |
|               | K76.8       | Other specified diseases of liver                                |
|               | K76.9       | Liver disease, unspecified                                       |
| <b>Stroke</b> | G46.4       | Cerebellar stroke syndrome                                       |
|               | G46.5       | Pure motor lacunar syndrome                                      |
|               | G46.6       | Pure sensory lacunar syndrome                                    |
|               | G46.7       | Other lacunar syndromes                                          |
|               | G46.3       | Brain stem stroke syndrome                                       |
|               | G45         | Transient cerebral ischaemic attacks and related syndromes       |
|               | G45.8       | Other transient cerebral ischaemic attacks and related syndromes |
|               | G45.9       | Transient cerebral ischaemic attack, unspecified                 |
| <b>Other</b>  | D83         | Common variable immunodeficiency                                 |
|               | M32         | SLE                                                              |
|               | L95.0       | Vasculitis                                                       |
|               | D60         | Acquired pure red cell aplasia                                   |

|  |       |                                             |
|--|-------|---------------------------------------------|
|  | D60.1 | Transient acquired pure red cell aplasia    |
|  | D60.8 | Other acquired pure red cell aplasias       |
|  | D60.9 | Acquired pure red cell aplasia, unspecified |
|  | D61.0 | Constitutional aplastic anaemia             |
|  | D61.3 | Idiopathic aplastic anaemia                 |
|  | D61.8 | Other specific aplastic anaemia             |
|  | D61.9 | Aplastic anaemia, unspecified               |
|  | D70   | Agranulocytosis                             |
|  | D69.3 | Idiopathic thrombocytopenic purpura         |
|  | D69.4 | Other primary thrombocytopenia              |
|  | D69.5 | Secondary thrombocytopenia                  |
|  | D69.6 | Thrombocytopenia, unspecified               |

11

12

13 Supplemental Table. 4 Clinical manifestations of the ten DADA2 carriers from seven unrelated kindreds. \*: recurrent verruca vulgaris; \*\*: upper respiratory  
 14 tract infections necessitating frequent antibiotic therapy. \*\*\*: retinal vasculitis, uveitis and vitritis. \*\*\*\*: termed as erythromelalgia.

| Patient no. (Kindred no.)                                                      | P1(F1)     | P2(F1) | P3(F2)    | P4(F2) | P5(F3) | P6(F4)     | P7(F5) | P8(F5)    | P9(F6)     | P10(F7)   | Cumulative N° of patient |
|--------------------------------------------------------------------------------|------------|--------|-----------|--------|--------|------------|--------|-----------|------------|-----------|--------------------------|
| <b>ADA2 mutation</b>                                                           | p.H424N/WT |        | p.G47V/WT |        |        | p.R169Q/WT |        | p.G47V/WT | p.R169Q/WT | p.G47R/WT |                          |
| <b>Manifestations</b>                                                          |            |        |           |        |        |            |        |           |            |           |                          |
| <b>(Muco)cutaneous</b>                                                         |            | +      |           | +      | +      |            |        | +         |            | +         | <b>5/10</b>              |
| Livedo                                                                         |            | +      |           |        |        |            |        | +         |            |           | 2/10                     |
| Raynaud phenomenon                                                             |            |        |           | +      |        |            |        |           |            |           | 1/10                     |
| Non-specific cutaneous vasculopathic lesions, including chilblain-like lesions |            |        |           |        | +****  |            |        |           |            | +         | 2/10                     |
| <b>Neurological</b>                                                            | +          |        |           |        |        | +          |        |           | +          |           | <b>3/10</b>              |
| Ischemic stroke                                                                | +          |        |           |        |        |            |        |           | +          |           | 2/10                     |
| White matter lesions                                                           |            |        |           |        |        | +          |        |           |            |           | 1/10                     |
| <b>Immunological/hematological</b>                                             |            |        | +         | +      | +      | +          |        |           |            |           | <b>4/10</b>              |
| Hypogammaglobulinemia                                                          |            |        | +         |        | +      | +          |        |           |            |           | 3/10                     |
| Insufficient pneumococcal antibody response                                    |            |        | +         |        |        | +          |        |           |            |           | 2/10                     |
| Neutropenia                                                                    |            |        | +         |        |        |            |        |           |            |           | 1/10                     |
| Thrombocytopenia                                                               |            |        | +         |        |        |            |        |           |            |           | 1/10                     |
| Deep venous thrombosis/pulmonary embolism                                      |            |        |           | +/+    |        |            |        |           |            |           | 1/10                     |
| <b>Infections</b>                                                              |            |        | +         | +      | +      |            |        |           |            |           | <b>3/10</b>              |
| Viral                                                                          |            |        | +         |        | +*     |            |        |           |            |           | 2/10                     |
| Bacterial                                                                      |            |        | +         |        | +**    |            |        |           |            |           | 2/10                     |
| <b>Gastro-intestinal</b>                                                       |            |        | +         |        |        |            |        |           | +          | +         | <b>3/10</b>              |
| Abdominal pain                                                                 |            |        | +         |        |        |            |        |           | +          |           | 2/10                     |

|                                  |  |  |   |  |  |  |      |   |  |   |             |
|----------------------------------|--|--|---|--|--|--|------|---|--|---|-------------|
| Chronic dyspepsia                |  |  | + |  |  |  |      |   |  |   | 1/10        |
| Nodular regenerative hyperplasia |  |  | + |  |  |  |      |   |  |   | 1/10        |
| Portal hypertension              |  |  | + |  |  |  |      |   |  |   | 1/10        |
| Hematemesis                      |  |  |   |  |  |  |      |   |  | + | 1/10        |
| <b>Musculoskeletal</b>           |  |  |   |  |  |  | +    |   |  | + | <b>2/10</b> |
| Arthritis                        |  |  |   |  |  |  | +    |   |  | + | 2/10        |
| Tendinitis                       |  |  |   |  |  |  |      |   |  | + | 1/10        |
| <b>Cardiovascular</b>            |  |  |   |  |  |  |      |   |  | + | <b>1/10</b> |
| Pericarditis                     |  |  |   |  |  |  |      |   |  | + | 1/10        |
| <b>Ocular</b>                    |  |  |   |  |  |  | **** |   |  |   | <b>1/10</b> |
| <b>Treatment</b>                 |  |  |   |  |  |  |      | + |  |   | <b>1/10</b> |
| TNF-inhibitor                    |  |  |   |  |  |  |      | + |  |   | 1/10        |

16 Supplemental Table. 5 Immunological blood results including immunological phenotype,  
 17 immunoglobulin levels and auto-antibodies of patient 3 (P3), patient 5 (P5) and patient 6 (P6).  
 18 -: negative; /: not applicable; \*, prior to IVIG treatment; \*\*, homogenous nuclear pattern, titer 1:80;  
 19 \*\*\*, p-ANCA titer 1:80.

|                                   |                       | P1      | P3      |         | P5      | P6      | P7     | P9     |
|-----------------------------------|-----------------------|---------|---------|---------|---------|---------|--------|--------|
|                                   | Ref. value            |         |         |         |         |         |        |        |
| Hemoglobin                        | 12.0-16.0 g/L         | 13.4    | 14.4    | 14.0    | 13.3    | 15.8    | 15     | /      |
| Platelets                         | 150 000-450 000/L     | 297 000 | 159 000 | 163 000 | 265 000 | 259 000 | 313000 | /      |
| White blood count                 | 4 500-13 000/ $\mu$ L | 8 820   | 5 850   | 5 760   | 4 890   | 10 650  | 9 670  | 6 970  |
| Neutrophils                       | 1 800-8 000/ $\mu$ L  | 4 730   | 3 600   | 3 600   | 2 700   | 5 500   | 6 700  | 4 070  |
| Monocytes                         | 600/ $\mu$ L          | 600     | 400     | 300     | 300     | 400     | 500    | 690    |
| Lymphocytes                       | 1 000-5 300/ $\mu$ L  | 3 290   | 1 802   | 1 800   | 1 700   | 4 500   | 2 100  | 1 920  |
| T cells (CD3+)                    | 800-3 500/ $\mu$ L    | 2 740   | 1 297   | 1 466   | 1 404   | 3 412   | 1 592  | 1 425  |
| CD4+                              | 400-2 100/ $\mu$ L    | 1 722   | 749     | 908     | 891     | 2 611   | 951    | 943    |
| CD8+                              | 200-1 200/ $\mu$ L    | 822     | 429     | 457     | 434     | 836     | 620    | 362    |
| CD56+                             | 4.3–16.2% of CD3+     | 3.2%    | 12.7%   | 10.4%   | 83%     | 0.3%    | 3.4%   | 4.5%   |
| HLA-DR+                           | 2.3-8.6% of CD3+      | 12.3%   | 6.4%    | 7.5%    | 4%      | 11.1%   | 15.0%  | 12.8%  |
| CD27+ CD45RA+                     | 40.9-65.7% of CD3+    | 72.5%   | 49%     | 46.5%   | 66.8%   | 56.5%   | 36.1%  | 42.1%  |
| CD4+/CD25+CD127 low               | 5.0-12.0% of CD4+     | /       | 5.6%    | 8.9%    | 7.2%    | 6%      | /      | /      |
| T-cell receptor                   |                       |         |         |         |         |         |        |        |
| $\alpha\beta$ TcR                 | 87-99.3% of CD3+      | 94.6%   | 88.10%  | 90.26%  | 94.3%   | 98.53%  | 99.46% | 92.94% |
| $\gamma\delta$ TcR                | 3.3-10% of CD3+       | 5.5%    | 10.5%   | 10.0%   | 5.2%    | 1.4%    | 0.3%   | 6.3%   |
| CD3+/CD4-CD8-                     | 4.3–10.7% of CD3+     | 5.2%    | 9.7%    | 9.0%    | 5.6%    | 1%      | 1.5%   | 7.0%   |
| B cells (CD19+)                   | 200-600/ $\mu$ L      | 394     | 251     | 222     | 209     | 956     | 252    | 209    |
| CD27+ IgM+ IgD+                   | 2.6-13.4% of CD19+    | 6.4%    | 9.9%    | 22.4%   | 12%     | 9.4%    | 25.6%  | 7.8%   |
| CD27+ IgM- IgD-                   | 4.0-21.2% of CD19+    | 5.4%    | 5.9%    | 10.6%   | 8.4%    | 4.3%    | 14.5%  | 16.5%  |
| CD27- IgM+ IgD+                   | 61.6-87.4% of CD19+   | 84.7%   | 78.5%   | 61.7%   | 72.1%   | 84.8%   | 53.7%  | 70.1%  |
| NK cells (CD3-/CD56 and/or CD16+) | 70-1200/ $\mu$ L      | 145     | 191     | 86      | 105     | 100     | 268    | 293    |
| IgG                               | 5.76-12.65 g/L        | 11.90   | 5.03*   | 12.5    | 10.7    | 4.43*   | 17.10  | /      |

|                                       |                      |      |            |      |       |          |             |       |
|---------------------------------------|----------------------|------|------------|------|-------|----------|-------------|-------|
| IgG2                                  | 1.06-6.10 g/L        | 1.53 | 1.05*      | 4.10 | 3.03  | 0.77*    | 5.43        |       |
| IgG3                                  | 0.18-1.63 g/L        | 0.78 | 0.33*      | 0.33 | 0.27  | 0.18*    | 0.36        |       |
| <b>IgA</b>                            | 0.81-2.32 g/L        | 2.70 | 0.44*      | 0.84 | 0.68  | 1.37*    | 1.56        |       |
| <b>IgM</b>                            | 0.30-1.59 g/L        | 0.90 | 1.29*      | 1.22 | 0.66  | 0.75*    | 1.69        |       |
| <b>Lymphocyte stimulation test</b>    |                      |      |            |      |       |          |             |       |
| Candida-index                         | ≥ 5.00               | /    | 43.17      | /    | /     | /        | /           | /     |
| Tetanus toxoid-index                  | ≥ 5.00               |      | 5.53       |      | /     | 132.27   |             | /     |
| PHA-index                             | ≥ 5.00               |      | 31.04      |      | 25.08 | 247.82   |             | 44.55 |
| <b>Pneumococcal antibody response</b> | Prior to vaccination |      |            |      |       |          |             |       |
| Pn type 8                             | 0.5 mg/L             | /    | 2.0 mg/L   | /    |       | 1.4 mg/L | /           | /     |
| Pn type 9N                            | 0.7-0.9 mg/L         |      | 2.3 mg/L   |      | /     | 0.8 mg/L |             |       |
| Pn type 15B                           | 1.2-1.9 mg/L         |      | 4.6 mg/L   |      |       | 1.7 mg/L |             |       |
| <b>Auto-antibodies</b>                |                      |      |            |      |       |          |             |       |
| ANA                                   |                      |      | -          | -    | -     | -        | positive**  |       |
| ANCA                                  |                      |      | -          | -    | -     | -        | positive*** |       |
| Anti-parietal cell antibody - IIF     |                      |      | -          |      |       |          |             |       |
| Intrinsic factor antibody             |                      |      | -          |      |       |          |             |       |
| Smooth muscle                         |                      |      | -          |      |       |          |             |       |
| Mitochondria – IIF                    |                      |      | -          |      |       |          |             |       |
| Cardiac muscle                        |                      |      | -          |      |       |          |             |       |
| Skeletal muscle                       |                      |      | -          |      |       |          |             |       |
| Pancreas                              |                      |      | -          |      |       |          |             |       |
| Adrenal gland                         |                      | /    | -          |      |       |          |             | /     |
| Glutamic acid decarboxylase 65kDa     | < 0.9 kU/L           |      | < 0.1 kU/L |      |       |          |             |       |
| Insulin                               | ≤ 5%                 |      | 1%         |      |       |          |             |       |
| Skin                                  |                      |      | -          |      |       |          |             |       |
| Salivary gland                        |                      |      | -          |      |       |          |             |       |
| Deamidated gliadin                    | ≤ 20.0 CU            |      | < 2.8 CU   |      |       |          |             |       |
| IgG                                   |                      |      |            |      |       |          |             |       |
| TPO                                   | ≤ 34 IU/mL           |      | 9 IU/mL    |      |       |          |             |       |
| TSH-receptor antibodies               | ≤ 1.0 IU/L           |      | < 1.0 IU/L |      |       |          |             |       |
| Liver-kidney-microsome – IIF          |                      |      | -          |      |       |          |             |       |

21 Supplemental Table. 6 Genetic characteristics and in silico prediction of pathogenicity of mutations in  
 22 ADA2 identified by whole exome sequencing. Genomic position according to the hg18 (GRCh38)  
 23 physical position. NM\_001282225.1 was used as reference transcript. CADD: Combined Annotation-  
 24 Dependent Depletion; Polyphen: Polymorphism Phenotyping v2; AF: Allele Frequency, AF was derived  
 25 using the gnomAD browser; SIFT: Sorting Intolerant From Tolerant (1).  
 26

| Patient                         | P1-2                  | P3-5, P8      | P6-7, P9      | P10           |
|---------------------------------|-----------------------|---------------|---------------|---------------|
| Chromosome                      | 22                    |               |               |               |
| Genomic position (substitution) | g.17181992G>T         | g.17209538C>A | g.17207107C>T | g.17209539C>T |
| Ref SNP cluster ID              | rs1416783635          | rs200930463   | rs77563738    | rs202134424   |
| cDNA position (substitution)    | c.1270C>A             | c.140G>T      | c.506G>A      | c.139G>A      |
| Protein position substitution   | p.H424N               | p.G47V        | p.R169Q       | p.G47R        |
| Zygoty                          | Heterozygous          |               |               |               |
| AF                              | 0.0000006196          | 0.000048      | 0.00047       | 0.00006692    |
| CADD                            | 24.8                  | 21.5          | 21.4          | 22.9          |
| MSC                             | 3.2                   |               |               |               |
| Polyphen-2                      | Probably damaging     |               |               |               |
| SIFT                            | Pathogenic supporting |               |               |               |

27  
 28



29 Supplemental Table. 7 Genetic intolerance scores for ADA2. f parameter: frequency parameter; lofTool:  
 30 loss-of-function Tool; SIS: Selection Intensity Score; evoTol: Evolutionary Tolerance Score; RVIS:  
 31 Residual Variation Intolerance Score; pLI: Probability of Loss-of-Function Intolerance; LOEUF: Loss-of-  
 32 Function Observed/Expected Upper Fraction; CoNeS: Combined Network Score; IEI classification:  
 33 Inborn Errors of Immunity Classification; IEND classification: Inborn Errors of Neurodevelopment  
 34 classification; hOMIM classification: Human Online Mendelian Inheritance in Man Classification; IEI  
 35 mode: Mode of Inheritance for Inborn Errors of Immunity; IEND mode of dominance: Mode of  
 36 Dominance for Inborn Errors of Neurodevelopment; EOHP/LOIP: Early-Onset/ Late-Onset  
 37 Immunodeficiency Predisposition; DOMINO: Dominance Inference for Inherited Disease Genes; p(HI):  
 38 Probability of Haploinsufficiency; SCoNeS: Single Cell Network Score; SCoNeS in leave-one-out: Single  
 39 Cell Network Score in Leave-One-Out Analysis.  
 40

| <b>Gene</b>             | <b>ADA2</b>  |
|-------------------------|--------------|
| f parameter             | 0,56162038   |
| lofTool                 | 0,161        |
| SIS                     | 0,41382086   |
| evoTol                  | 4,7380157    |
| RVIS                    | -0,10570191  |
| pLI                     | 8,1396E-08   |
| LOEUF                   | 0,68448      |
| CoNeS                   | -0,115379718 |
| IEI classification      | IEI AR       |
| IEND classification     | IEI          |
| hOMIM classification    | IEI          |
| IEI mode                | NA           |
| IEND mode of dominance  | NA           |
| EOHP/LOIP               | LOIP         |
| DOMINO                  | 0,069576     |
| p(HI)                   | 0,37         |
| SCoNeS                  | 0,994        |
| SCoNeS in leave-one-out | 0,992        |

41

42

43

44 Supplemental Table. 8 Frequency of ADA2 dominant negative variants in the general population from  
 45 gnomAD v4.1.0 (1) \* ENST00000399837.8, \*\* There are 0 homozygotes in gnomAD for any of these  
 46 variants

| Variant<br>MANE<br>transcript*<br>protein<br>impact | GRCh38<br>coordinates   | Allele count**<br>in gnomAD<br>v4.1.0 | Allele<br>Number in<br>gnomAD<br>v4.1.0 | Pop max in<br>gnomAD       | AF Pop max in<br>gnomAD |
|-----------------------------------------------------|-------------------------|---------------------------------------|-----------------------------------------|----------------------------|-------------------------|
| p.G47V                                              | 22-<br>17209538-C-<br>A | 48                                    | 1,613,586                               | Middle Eastern             | 0.00033                 |
| p.G47A                                              | 22-<br>17209538-C-<br>G | 78                                    | 1,613,704                               | Admixed<br>American        | 0.000083                |
| p.G47R                                              | 22-<br>17209539-C-<br>T | 108                                   | 1,613,980                               | Middle Eastern             | 0.00082                 |
| p.G47R                                              | 22-<br>17209539-C-<br>G | 34                                    | 1,613,982                               | South Asian                | 0.00011                 |
| p.R169Q                                             | 22-<br>17207107-C-<br>T | 810                                   | 1,614,176                               | European<br>(Finnish)      | 0.0018                  |
| p.E328K                                             | Not present             | Not present                           | NA                                      | NA                         | NA                      |
| p.H424N                                             | 22-<br>17181992-G-<br>T | 1                                     | 1,613,878                               | NA                         | NA                      |
| p.Y453C                                             | 22-<br>17181904-T-<br>C | 183                                   | 1,614,136                               | European (non-<br>Finnish) | 0.00014                 |

47

48

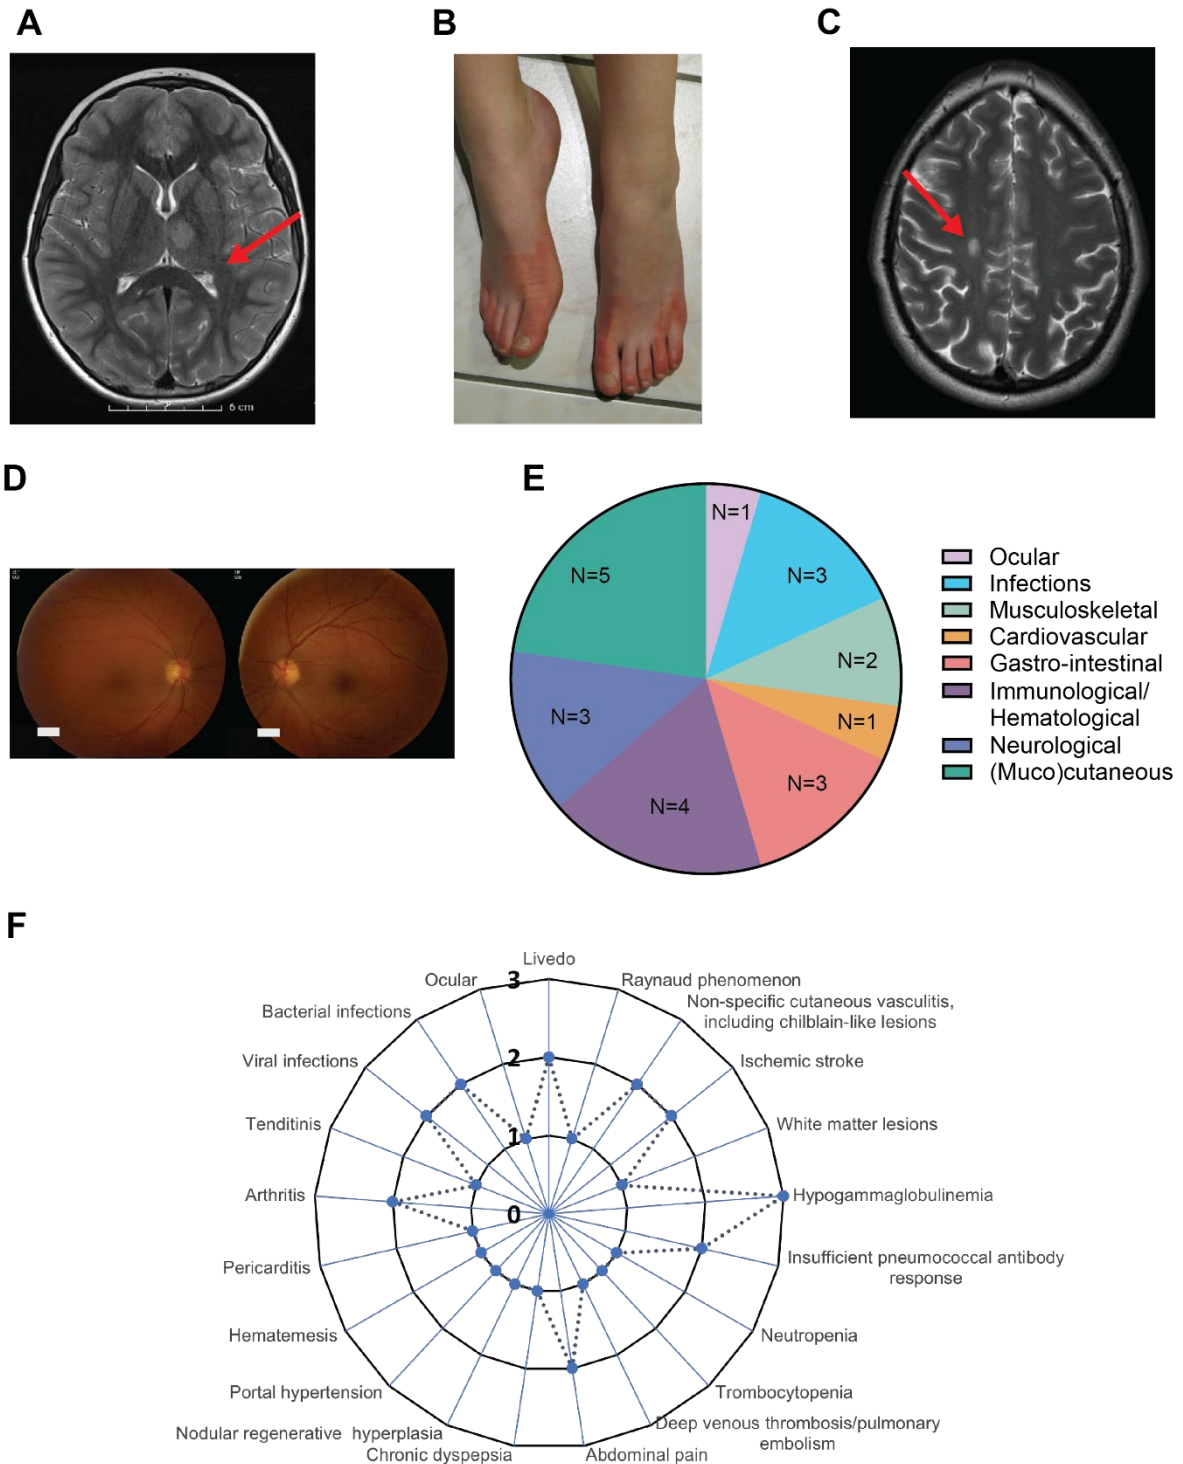

49

50 Supplemental Figure 1. Clinical and radiographic findings of the 10 DADA2 carriers.

51 **A.** Brain MRI of P1 revealing a diffusion restrictive T2-weighted hyperintense lesion with focus  
 52 anteromedially in the left thalamus, indicating a recent ischemic infarct. **B.** Clinical image of P5  
 53 displaying painful purple to red skin discoloration and swelling of the feet. **C.** Brain MRI of P6 showing  
 54 an oval lesion in the right centrum semiovale, hyperintense on T2 and FLAIR, hypointense on T1, with  
 55 restricted diffusion and a maximum diameter of 11 mm. **D.** Fundoscopy of P6. The right eye (OD, oculus

56 dexter) shows retinal vasculitis and retinitis with inferiorly located snow ball opacities; left eye (OS,  
57 oculus sinister) shows retinitis and vitritis. **E.** Circle diagram illustrating the phenotype distribution by  
58 absolute number of affected patients. **F.** Radar graph representing the number of patients affected by  
59 various clinical manifestations.

60

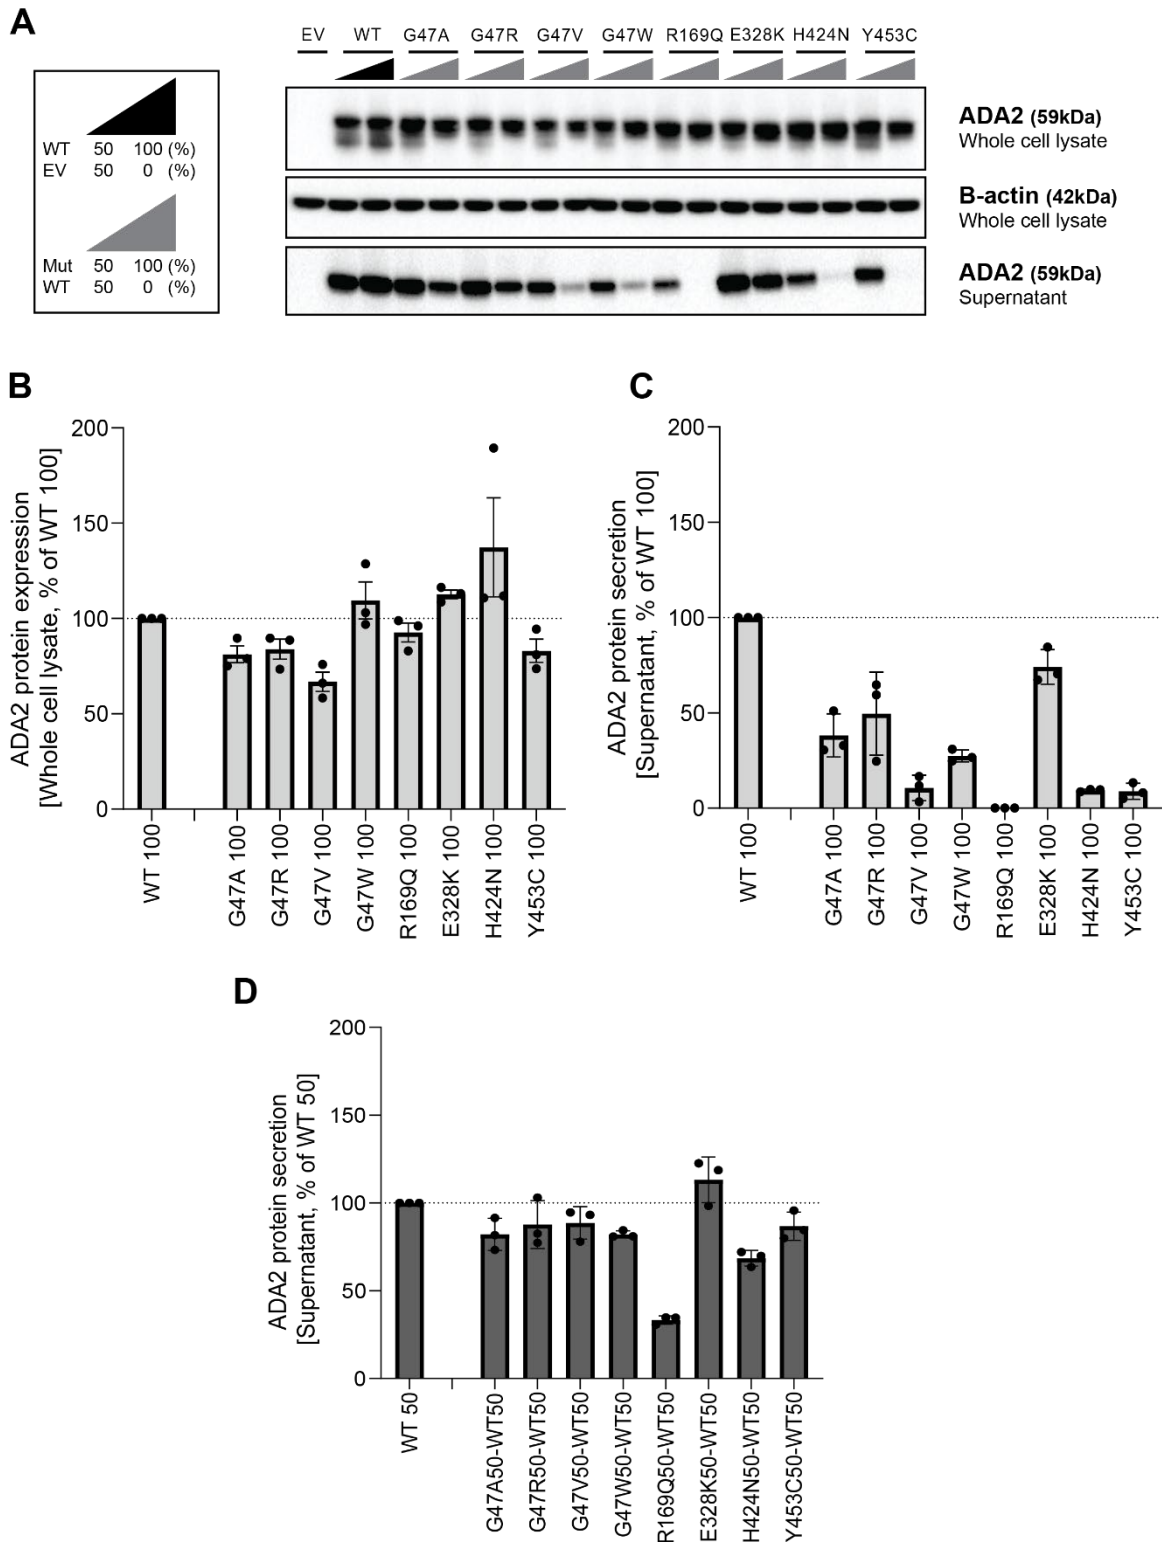

61

62 Supplemental Figure 2. ADA2 protein expression and secretion in homogenous and heterozygous  
 63 state on denaturing gel.

64 **A.** Immunoblot of whole cell lysate and supernatants of HEK293T cells transfected with different ADA2  
 65 variants in homozygous state or together with WT ADA2 (heterozygous state). Cells and supernatant  
 66 were collected 48h after transfection. Image shown represents 3 independent experiments. Loading  
 67 control: B-actin. **B.** Quantification of ADA2 protein expression in whole cell lysate of transfected

68 HEK293T cells with wild-type ADA2 or ADA2 variants in homozygous conditions. Bar graphs represent  
69 percentage of ADA2 protein expression relative to wild-type ADA2 100%. **C.** Quantification of ADA2  
70 secretion in supernatant of transfected HEK293T cells with wild-type ADA2 or ADA2 variants in  
71 homozygous conditions. Bar graphs represent percentage of ADA2 protein expression relative to wild-  
72 type ADA2 100%. **D.** Quantification of ADA2 secretion in supernatant co-transfected HEK293T cells of  
73 ADA2 variants together with wild-type in heterozygous conditions. Bar graphs represent percentage of  
74 ADA2 secretion relative to wild-type ADA2 50%. **A-D.** Each bar represents mean  $\pm$  SD from 3  
75 independent experiments.

76

77

**A**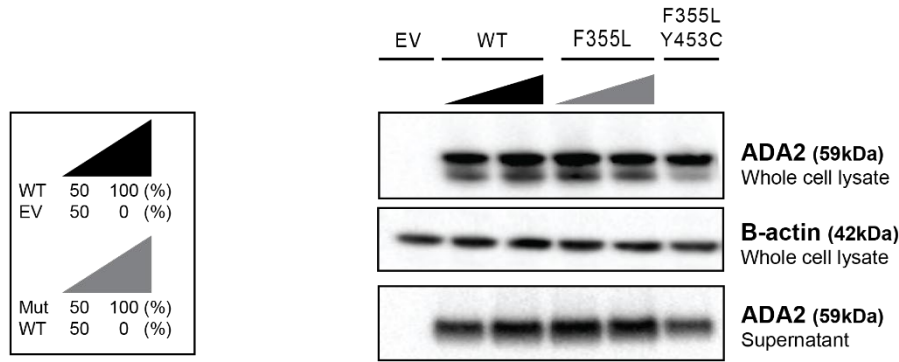**B**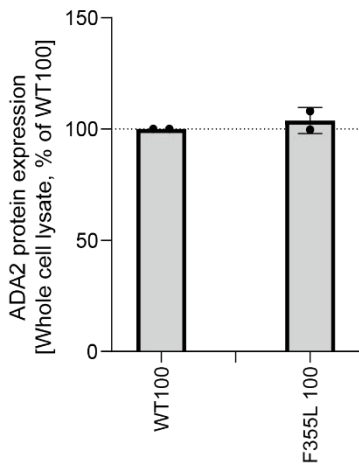**C**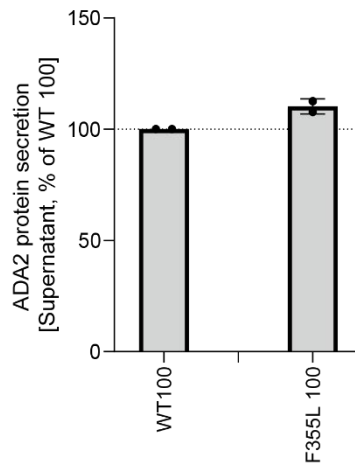**D**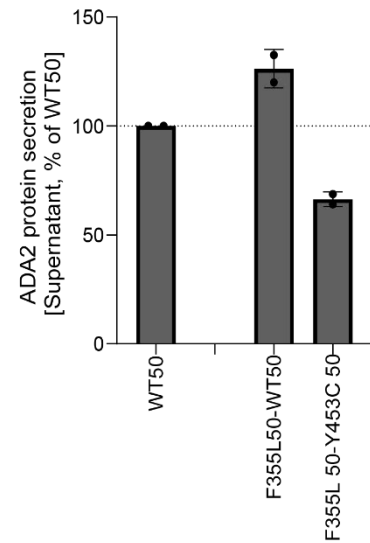

78

79 Supplemental Figure 3. ADA2 protein expression and secretion in homogenous and heterozygous state  
 80 of variant F355L on denaturing gel.

81 **A.** Immunoblot of whole cell lysate and supernatants of HEK293T cells transfected with ADA2 variant  
 82 F355L in homozygous state, together with WT ADA2 or with ADA2 variant Y453C in carrier state. Cells  
 83 and supernatant were collected 48h after transfection. Image shown represents 2 independent  
 84 experiments. Loading control: B-actin. **B.** Quantification of ADA2 protein expression in whole cell lysate  
 85 of transfected HEK293T cells with wild-type ADA2 or ADA2 variant F355L in homozygous conditions.  
 86 Bar graphs represent percentage of ADA2 protein expression relative to wild-type ADA2 100%. **C.**  
 87 Quantification of ADA2 secretion in supernatant of transfected HEK293T cells with wild-type ADA2 or  
 88 ADA2 variant F355L in homozygous conditions. Bar graphs represent percentage of ADA2 protein  
 89 expression relative to wild-type ADA2 100%. **D.** Quantification of ADA2 secretion of co-transfected  
 90 HEK293T cells of ADA2 variant F355L together with wild-type in heterozygous conditions. Bar graphs  
 91 represent percentage of ADA2 secretion relative to wild-type ADA2 50%. **A-D.** Each bar represents  
 92 mean  $\pm$  SD from 2 independent experiments.

93

**A**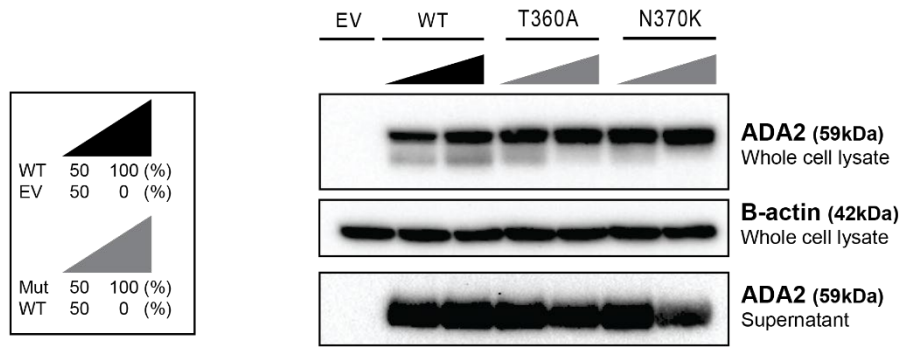**B**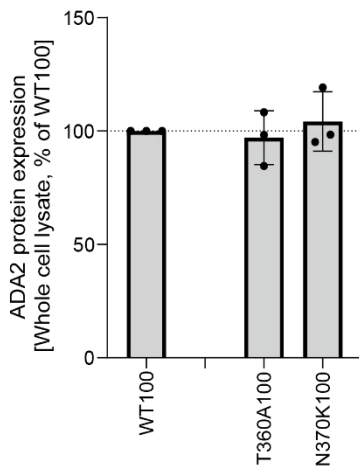**C**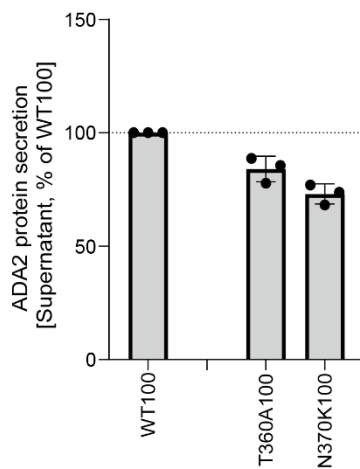**D**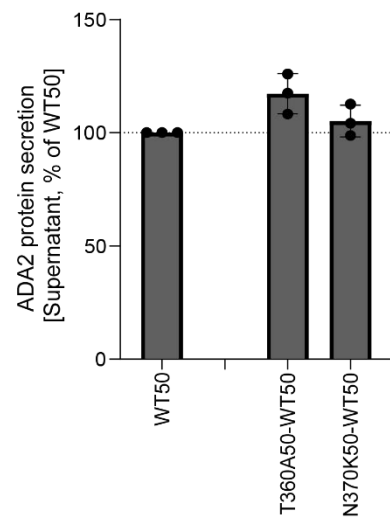

94

95 Supplemental Figure 4. ADA2 protein expression and secretion in homogenous and heterozygous state  
 96 of variants T360A and N370K on denaturing gel.

97 **A.** Immunoblot of whole cell lysate and supernatants of HEK293T cells transfected with ADA2 variants  
 98 T360A and N370K in homozygous state or together with WT ADA2. Cells and supernatant were  
 99 collected 48h after transfection. Image shown represents 3 independent experiments. Loading control:  
 100 B-actin. **B.** Quantification of ADA2 protein expression in whole cell lysate of transfected HEK293T cells  
 101 with wild-type ADA2 or ADA2 variants T360A and N370K in homozygous conditions. Bar graphs  
 102 represent percentage of ADA2 protein expression relative to wild-type ADA2 100%. **C.** Quantification  
 103 of ADA2 secretion in supernatant of transfected HEK293T cells with wild-type ADA2 or ADA2 variants  
 104 T360A and N370K in homozygous conditions. Bar graphs represent percentage of ADA2 protein  
 105 expression relative to wild-type ADA2 100%. **D.** Quantification of ADA2 secretion of co-transfected  
 106 HEK293T cells of ADA2 variants T360A and N370K together with wild-type in heterozygous conditions  
 107 Bar graphs represent percentage of ADA2 secretion relative to wild-type ADA2 50%. experiments. **A-D.**  
 108 Each bar represents mean  $\pm$  SD from 3 independent experiments.

109



**A**

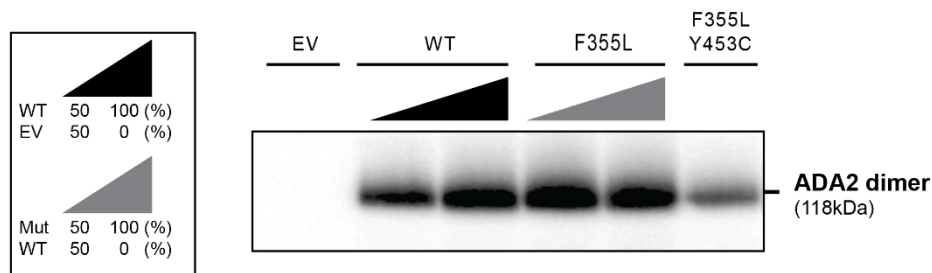

**B**

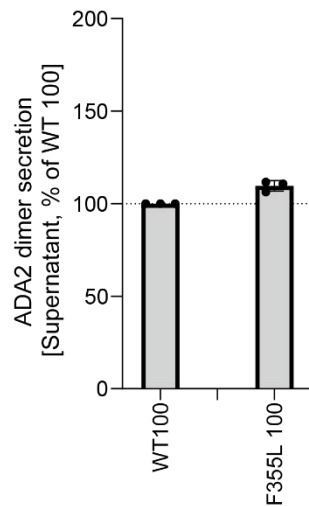

**C**

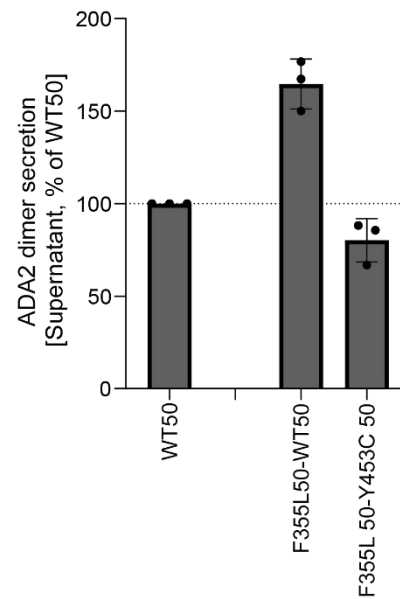

110

111 Supplemental Figure 5. Secretion of ADA2 dimers in homozygous or heterozygous state of variant F355L  
112 on non-denaturing gel.

113 **A.** ADA2 dimer secretion of HEK293T cells transfected with WT and/or ADA2 variant F355L. Cells and  
114 supernatant were collected 48h after transfection. Image shown represents 3 independent  
115 experiments. **B.** Quantification of ADA2 secretion in supernatant of transfected HEK293T cells with  
116 wild-type ADA2 or ADA2 variant F355L in homozygous conditions. Bar graphs represent percentage of  
117 ADA2 protein secretion relative to wild-type ADA2 100%. **C.** Quantification of ADA2 secretion of co-  
118 transfected HEK293T cells of ADA2 variant F355L together with wild-type ADA2 in heterozygous  
119 conditions. Bar graphs represent percentage of ADA2 secretion relative to wild-type ADA2 50%. **B-C.**  
120 Each bar represents mean  $\pm$  SD from 3 independent experiments.

121

122

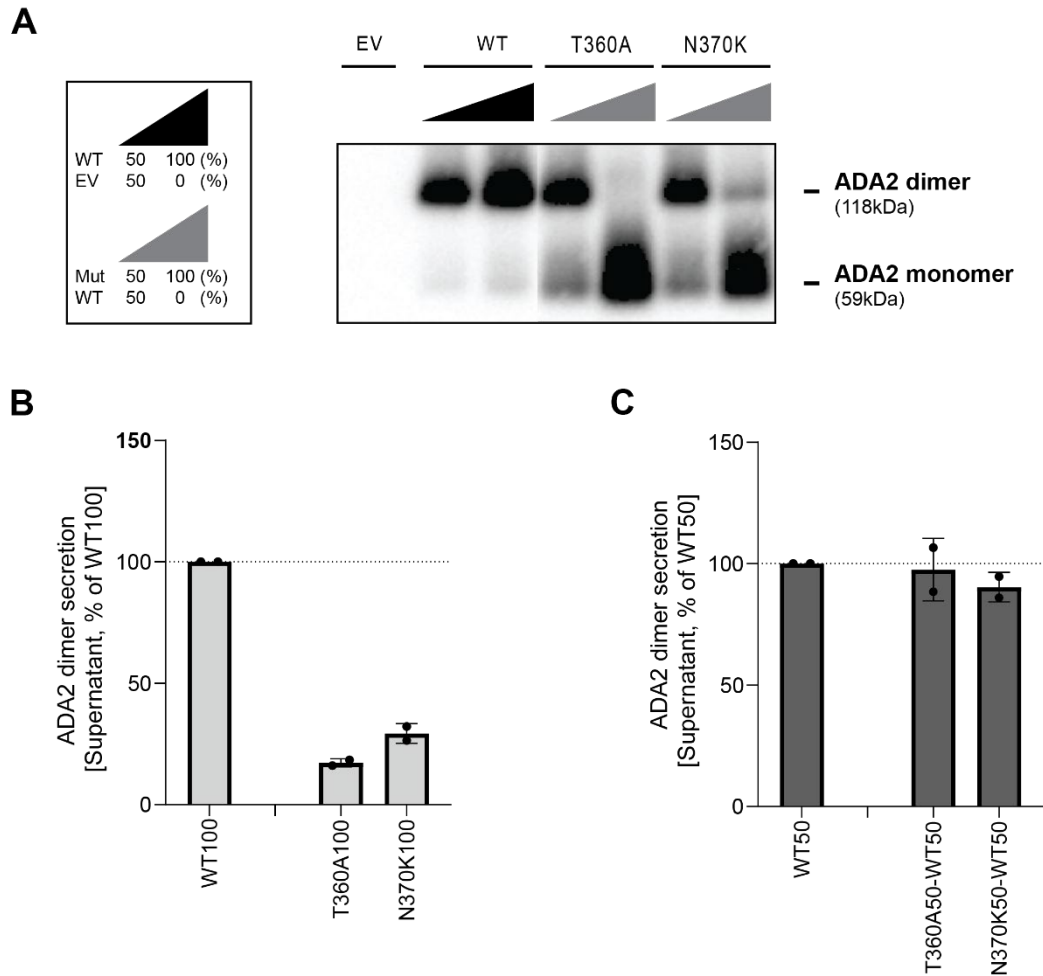

123

124 Supplemental Figure 6. Secretion of ADA2 dimers in homozygous or heterozygous state of ADA2  
 125 variants T360A and N370K on non-denaturing gel.

126 **A.** ADA2 dimer secretion of HEK293T cells transfected with WT and/or ADA2 variants T360A and N370K.  
 127 Cells and supernatant were collected 48h after transfection. Image shown represents 2 independent  
 128 experiments. **B.** Quantification of ADA2 secretion in supernatant of transfected HEK293T cells with  
 129 wild-type ADA2 or ADA2 variants T360A and N370K in homozygous conditions. Bar graphs represent  
 130 percentage of ADA2 protein secretion relative to wild-type ADA2 100%. **C.** Quantification of ADA2  
 131 secretion of co-transfected HEK293T cells of ADA2 variants T360A and N370K together with wild-type  
 132 ADA2 in heterozygous conditions. Bar graphs represent percentage of ADA2 secretion relative to wild-  
 133 type ADA2 50%. **B-C.** Each bar represents mean  $\pm$  SD from 3 independent experiments.

134

135

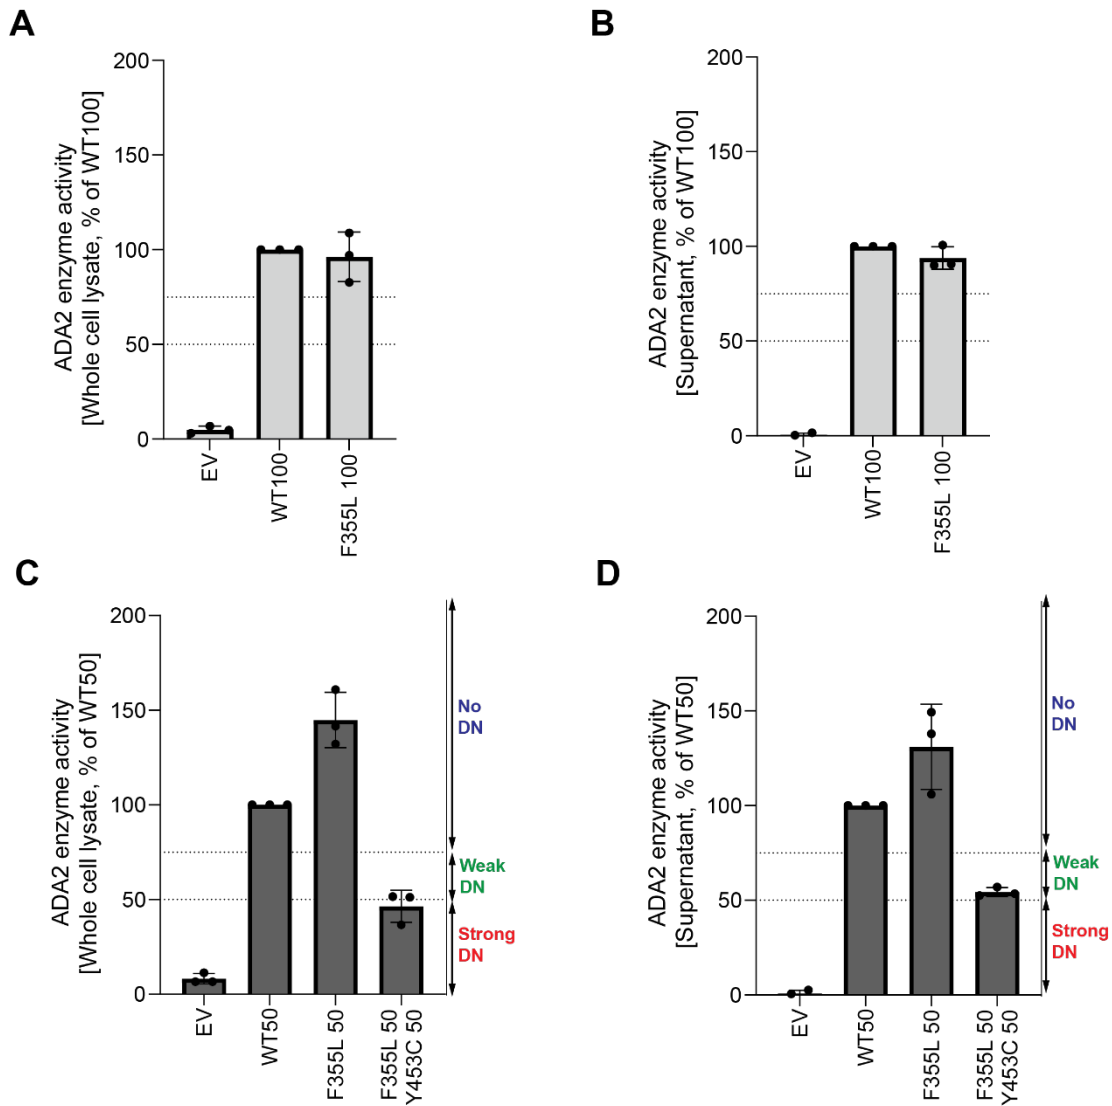

136

137 Supplemental Figure 7. Adenosine deaminase activity of variant F355L in ADA2 in homozygous or  
 138 heterozygous state.

139 **A.** Adenosine deaminase activity in whole cell lysate of HEK293T transfected cells with WT and ADA2  
 140 variant F355L in homozygous conditions. Bar graphs represent the percentage of enzymatic activity  
 141 relative to wild-type ADA2 100%. **B.** Adenosine deaminase activity in supernatant of HEK293T  
 142 transfected cells with WT and ADA2 variant F355L in homozygous conditions. Bar graphs represent the  
 143 percentage of enzymatic activity relative to wild-type ADA2 100%. **C.** Adenosine deaminase activity in  
 144 whole cell lysate of HEK293T transfected cells with WT and/or ADA2 variant F355L in heterozygous  
 145 conditions. Bar graphs represent the percentage of enzymatic activity relative to wild-type ADA2 50%..  
 146 **D.** Adenosine deaminase activity in supernatant of HEK293T transfected cells with WT and/or ADA2  
 147 variant F355L in heterozygous conditions. Bar graphs represent the percentage of enzymatic activity  
 148 relative to wild-type ADA2 50%. **A-D.** Data represents mean  $\pm$  SD from 3 independent experiments.

149

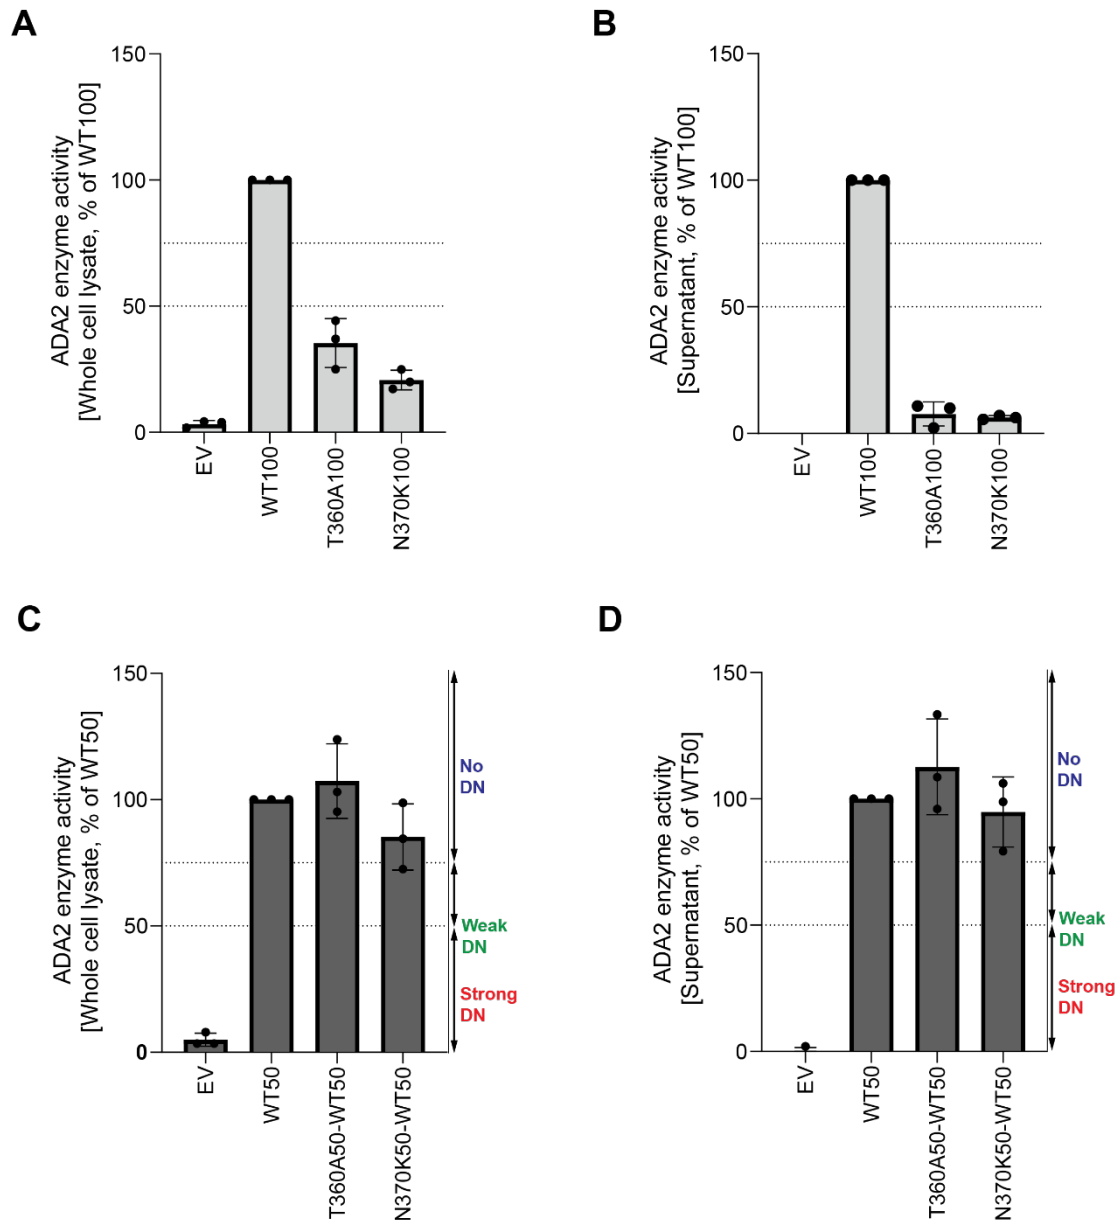

150

151 Supplemental Figure 8. Adenosine deaminase activity of ADA2 variants T360A and N370K in  
 152 homozygous or heterozygous state.

153 **A.** Adenosine deaminase activity in whole cell lysate of HEK293T transfected cells with WT and ADA2  
 154 variants T360A and N370K in homozygous conditions. Bar graphs represent the percentage of  
 155 enzymatic activity relative to wild-type ADA2 100%. **B.** Adenosine deaminase activity in supernatant of  
 156 HEK293T transfected cells with WT and ADA2 variants T360A and N370K in homozygous conditions.  
 157 Bar graphs represent the percentage of enzymatic activity relative to wild-type ADA2 100%. **C.**  
 158 Adenosine deaminase activity whole cell lysate of HEK293T transfected cells with WT and/or ADA2  
 159 variants T360A and N370K in heterozygous conditions. Bar graphs represent the percentage of  
 160 enzymatic activity relative to wild-type ADA2 50%. **D.** Adenosine deaminase activity in supernatant of  
 161 HEK293T transfected cells with WT and/or ADA2 variants T360A and N370K in heterozygous conditions.  
 162 Bar graphs represent the percentage of enzymatic activity relative to wild-type ADA2 50%. **A-D.** Data  
 163 represents mean  $\pm$  SD from 3 independent experiments.

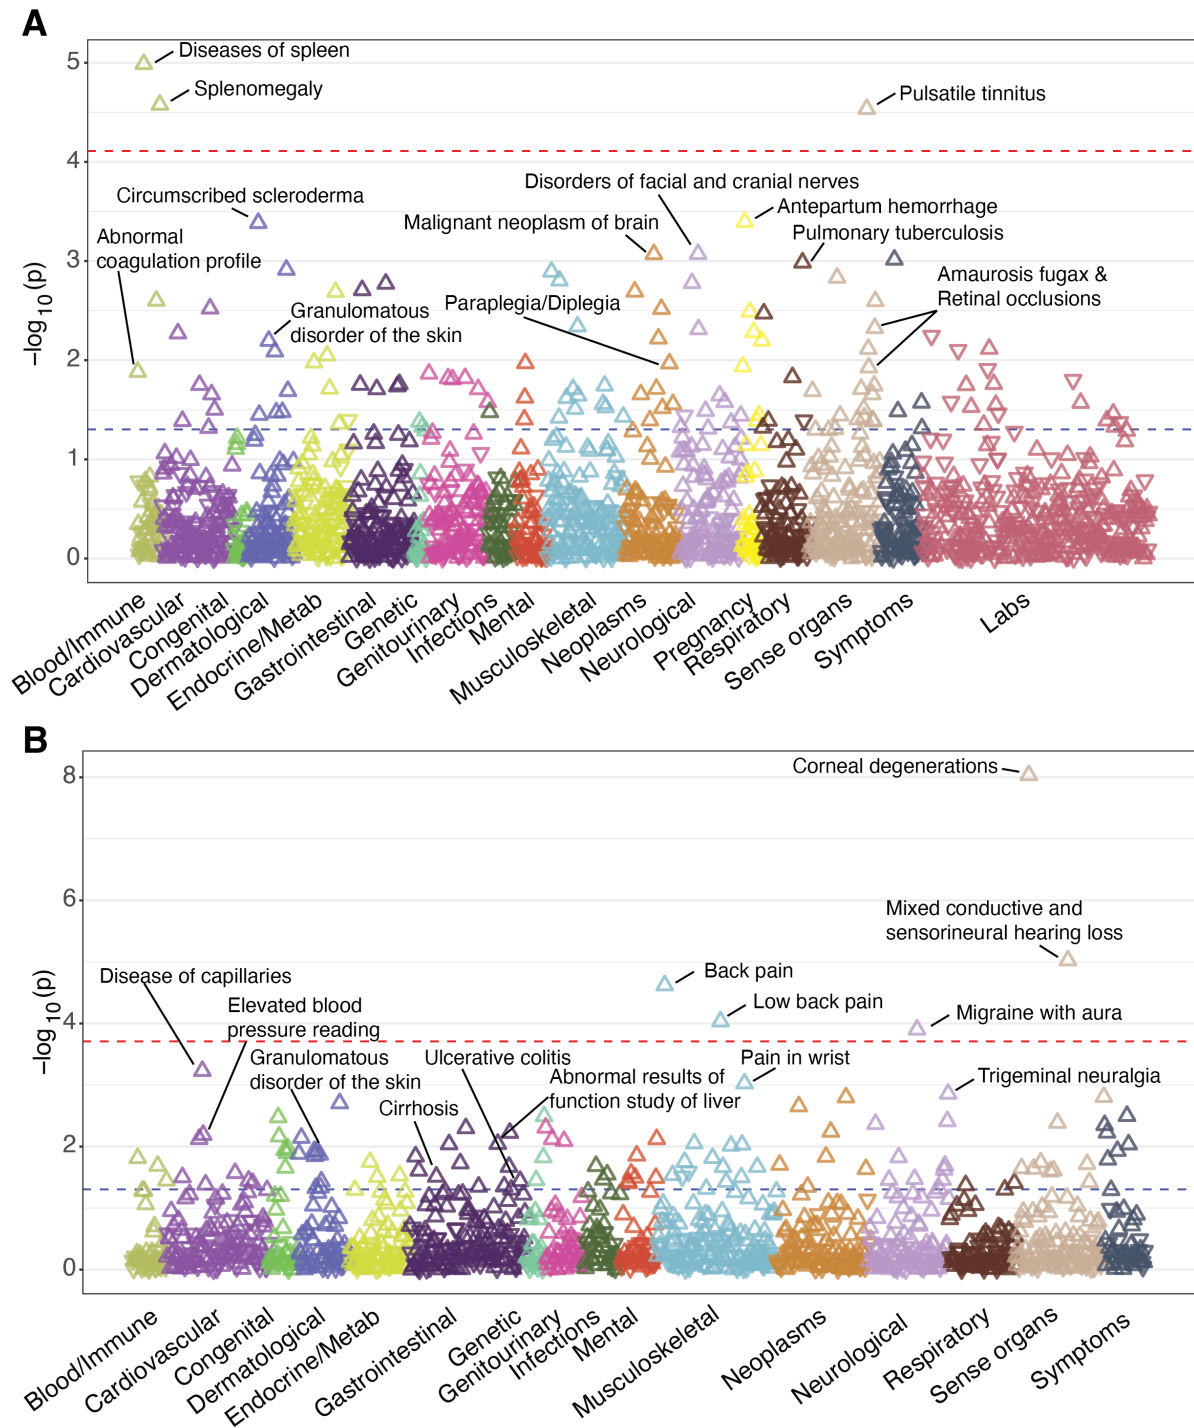

164

165 Supplemental Figure 9. PheWAS of *ADA2* pLOFs in the BioMe BioBank and the UK Biobank.

166 **A.** Gene-based PheWAS results in the BioMe BioBank ( $n = 27,742$ ). **B.** Gene-based PheWAS results in  
 167 the UK Biobank ( $n = 189,440$ ). The direction of the triangles indicates the direction of effect (up:  
 168 increased risk, down: decreased risk). The red dashed line represents false discovery rate (FDR)-  
 169 adjusted  $P$  value threshold, whereas the blue dashed line indicates the nominal significance level ( $P =$   
 170  $0.05$ ).

171

172

173 **References:**

174 1. Karczewski KJ, et al. The mutational constraint spectrum quantified from variation in 141,456  
175 humans. *Nature*. 2020;581(7809):434–443.

176
